# Supplementary material for: Influence of chronic consumption of thermoxidized palm oil diet on platelet aggregation in the rat
Source: HighWire-hosted journal article supplement (doi:10.1136/jim-2020-001685), 1992-01-01
Supplement: jim-2020-001685supp001_data_supplement.pdf [file jim-2020-001685supp001_data_supplement.pdf]

**Supplementary Table 1 Comparison of repair of epithelial cell injury in each group**

| Group   | Number | 0 h   | 48 h  | 96 h  |
|---------|--------|-------|-------|-------|
| A       | 20     | 30    | 75    | 80    |
| B       | 20     | 33    | 72    | 85    |
| Control | 20     | 10    | 32    | 35    |
| P       | ---    | 0.005 | 0.004 | 0.003 |

**Supplementary Table 2 Comparison of monolayer cell barrier function (TER) in each group**

| Group   | Number | 0 h   | 3 h   | 9 h   | 12 h  |
|---------|--------|-------|-------|-------|-------|
| A       | 20     | 1650  | 1580  | 1530  | 1490  |
| B       | 20     | 1620  | 1540  | 1520  | 1450  |
| Control | 20     | 1630  | 1480  | 932   | 500   |
| P       | ---    | 0.005 | 0.004 | 0.001 | 0.006 |

**Supplementary Table 3 The function of monolayer cell barrier was detected by Western blot (Optical density value)**

| Group   | Number | ZO-1                | Occludin           | $\beta$ -actin      |
|---------|--------|---------------------|--------------------|---------------------|
| A       | 20     | 896.36 $\pm$ 75.82  | 631.75 $\pm$ 59.28 | 901.52 $\pm$ 79.38  |
| B       | 20     | 1002.79 $\pm$ 79.23 | 790.17 $\pm$ 68.57 | 1527.49 $\pm$ 89.48 |
| Control | 20     | 723.05 $\pm$ 69.25  | 512.86 $\pm$ 55.02 | 311.36 $\pm$ 43.75  |
| P       | ---    | 0.002               | 0.001              | 0.001               |

**Supplementary Table 4 The expression of tight junction protein in monolayer cells was detected by Western blot (Optical density value)**

| Group | Number | ZO-1           | Occludin       | $\beta$ -actin |
|-------|--------|----------------|----------------|----------------|
| -     | 20     | 1203.85±102.58 | 1365.14±113.60 | 1260.36±90.18  |
| +     | 20     | 224.55±32.57   | 1295.11±98.25  | 1265.03±115.57 |
| -     | 20     | 1320.52±85.71  | 1251.96±88.25  | 1209.15±101.23 |
| +     | 20     | 1293.17±75.49  | 127.78±77.19   | 1299.05±113.26 |
| P     | -      | 0.000          | 0.129          | 0.098          |

**Supplementary Table 5 Effects of monolayer cells on bacterial adhesion and invasion in each group**

| Group  | A                 | B                 | Control           | P     |
|--------|-------------------|-------------------|-------------------|-------|
| Number | 20                | 20                | 20                | ---   |
| CFU    | $1.7 \times 10^4$ | $1.8 \times 10^4$ | $3.2 \times 10^4$ | 0.007 |
