# Supplementary figures and images for: Influence of chronic consumption of thermoxidized palm oil diet on platelet aggregation in the rat
Source: HighWire-hosted journal article supplement (doi:10.1136/jim-2020-001685), 1992-01-01

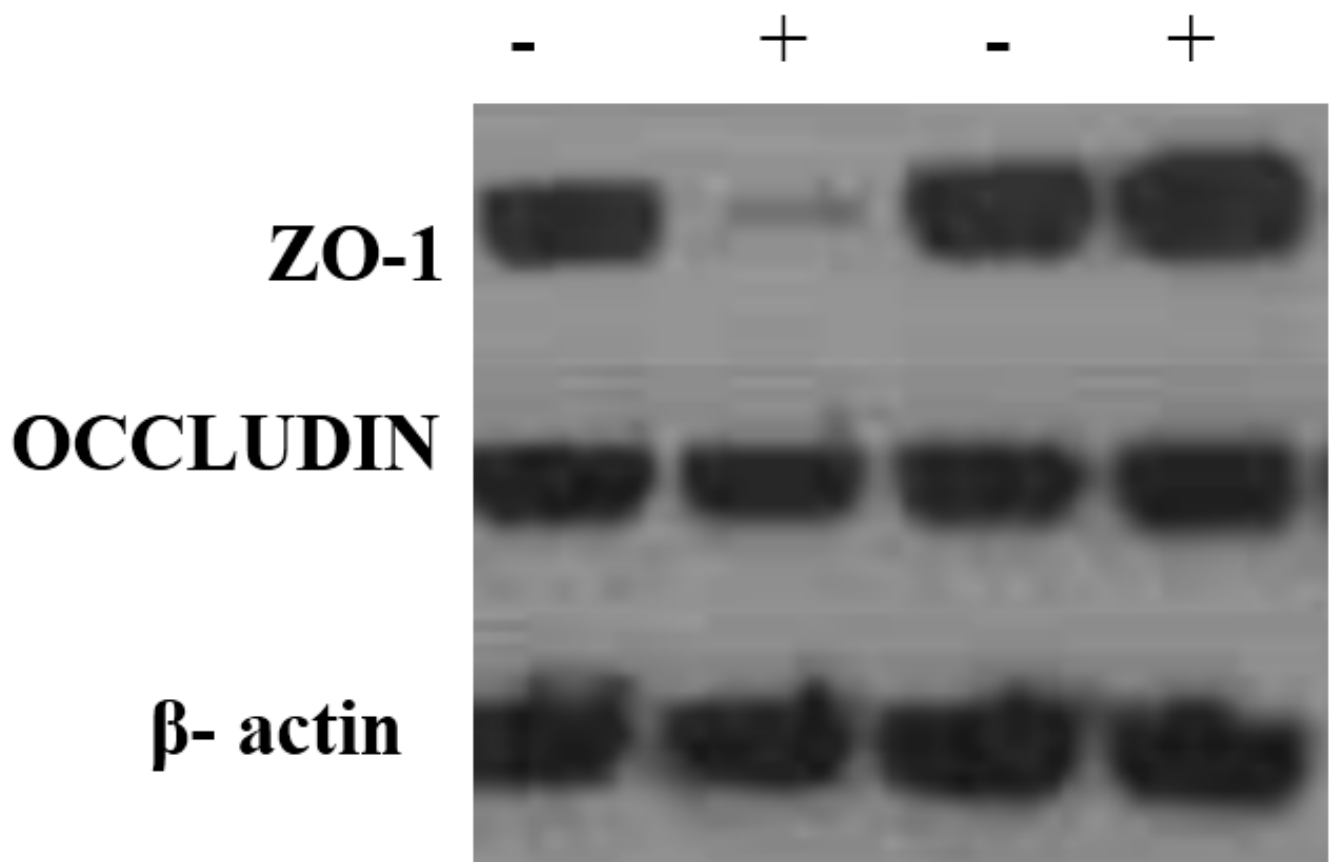

Supplement: jim-2020-001685supp002_data_supplement.pdf [file jim-2020-001685supp002_data_supplement.pdf]

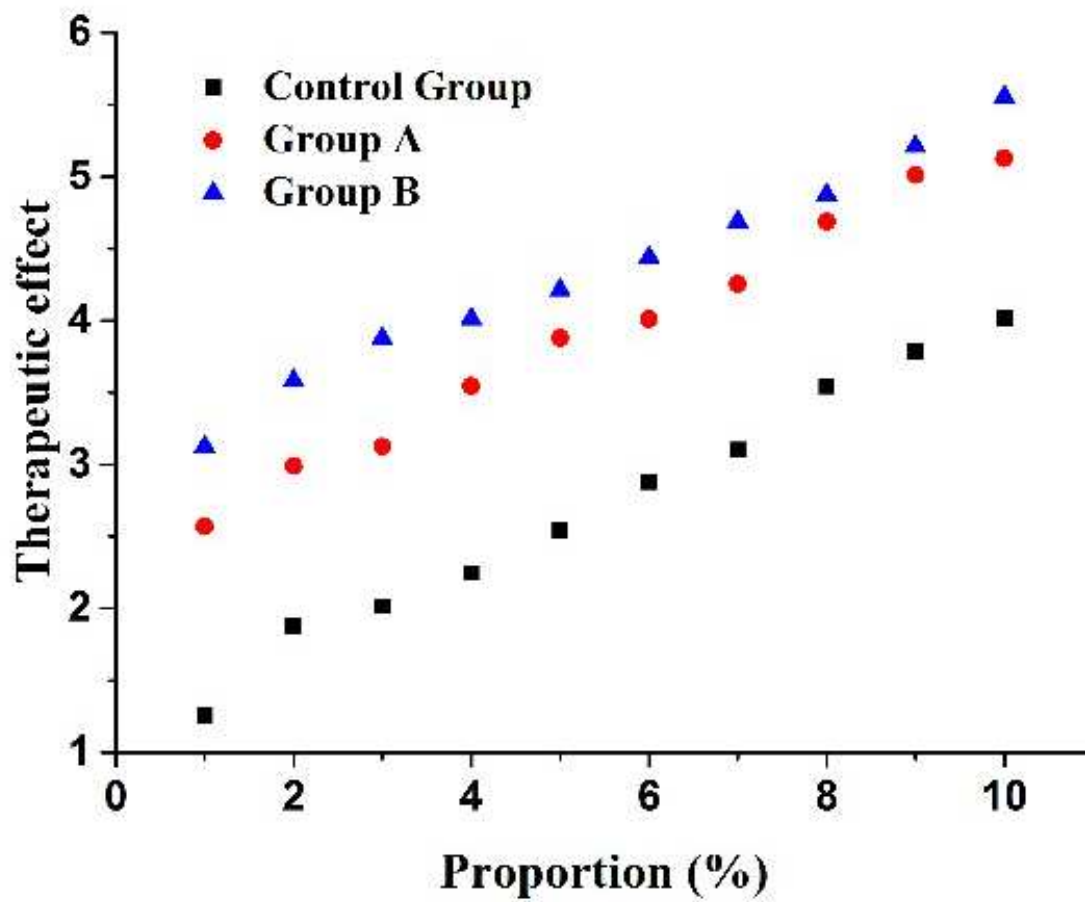

Supplement: jim-2020-001685supp003_data_supplement.pdf [file jim-2020-001685supp003_data_supplement.pdf]
